# Supplementary material for: Imaging-genomics reveals driving pathways of MRI derived volumetric tumor phenotype features in Glioblastoma
Source: Springer Nature journal article supplement (doi:10.1186/s12885-016-2659-5), 2016-08-08
Supplement: MOESM1 [file 10565296]

A

## Necrosis

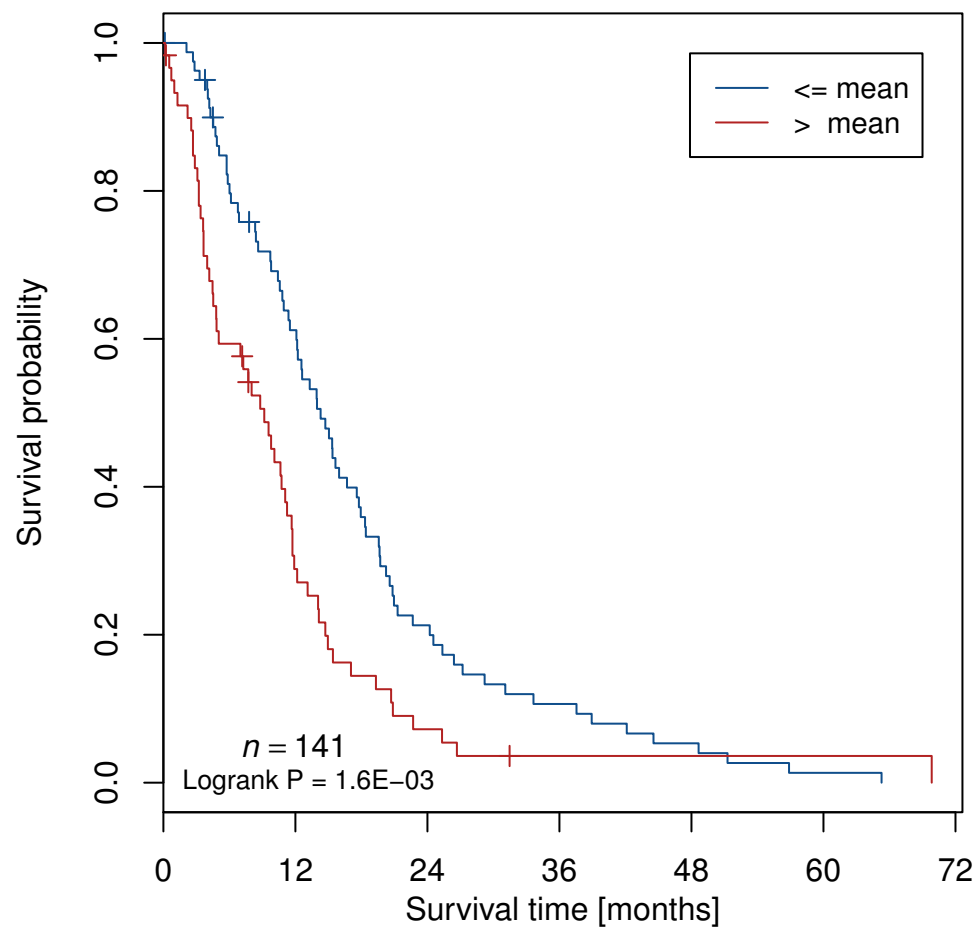

## No. At Risk

|         | 0  | 12 | 24 | 36 | 48 | 60 | 72 |
|---------|----|----|----|----|----|----|----|
| <= mean | 81 | 46 | 16 | 8  | 4  | 1  | 0  |
| > mean  | 60 | 16 | 4  | 1  | 1  | 1  | 0  |

B

## Contrast Enhancing

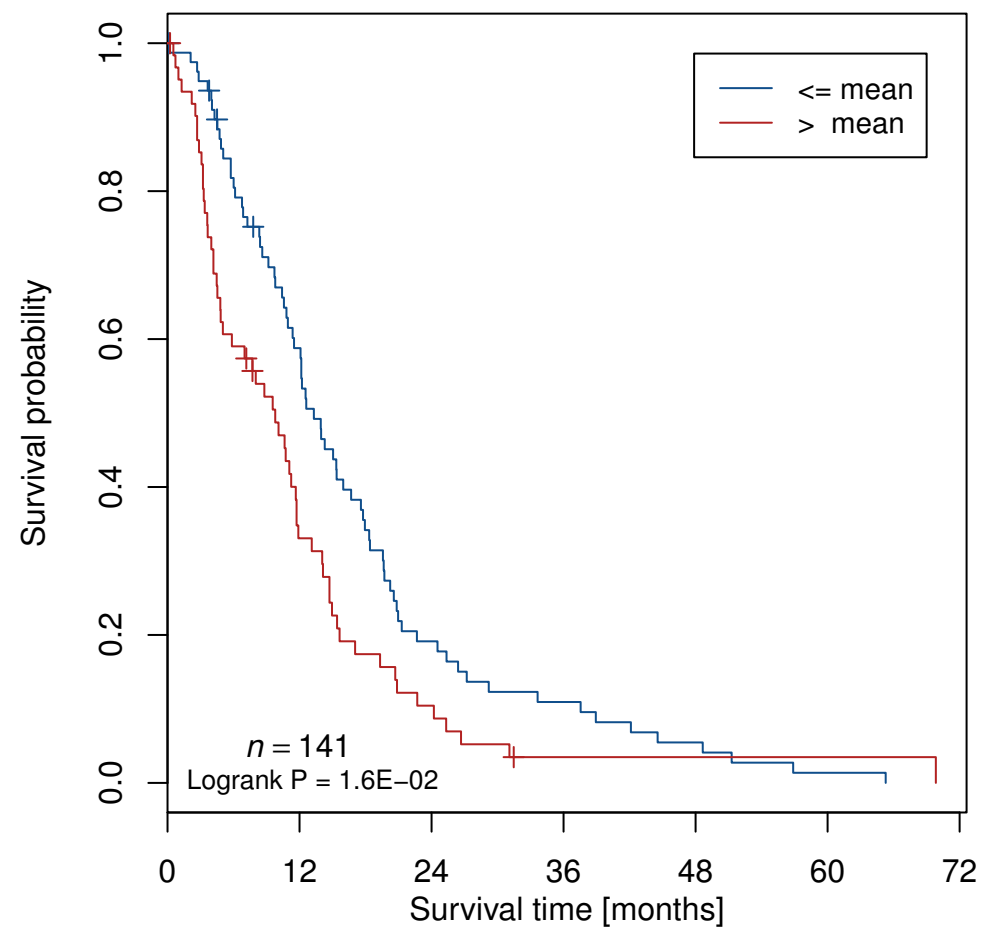

## No. At Risk

|         | 0  | 12 | 24 | 36 | 48 | 60 | 72 |
|---------|----|----|----|----|----|----|----|
| <= mean | 79 | 43 | 14 | 8  | 4  | 1  | 0  |
| > mean  | 62 | 19 | 6  | 1  | 1  | 1  | 0  |

C

## Tumor Bulk

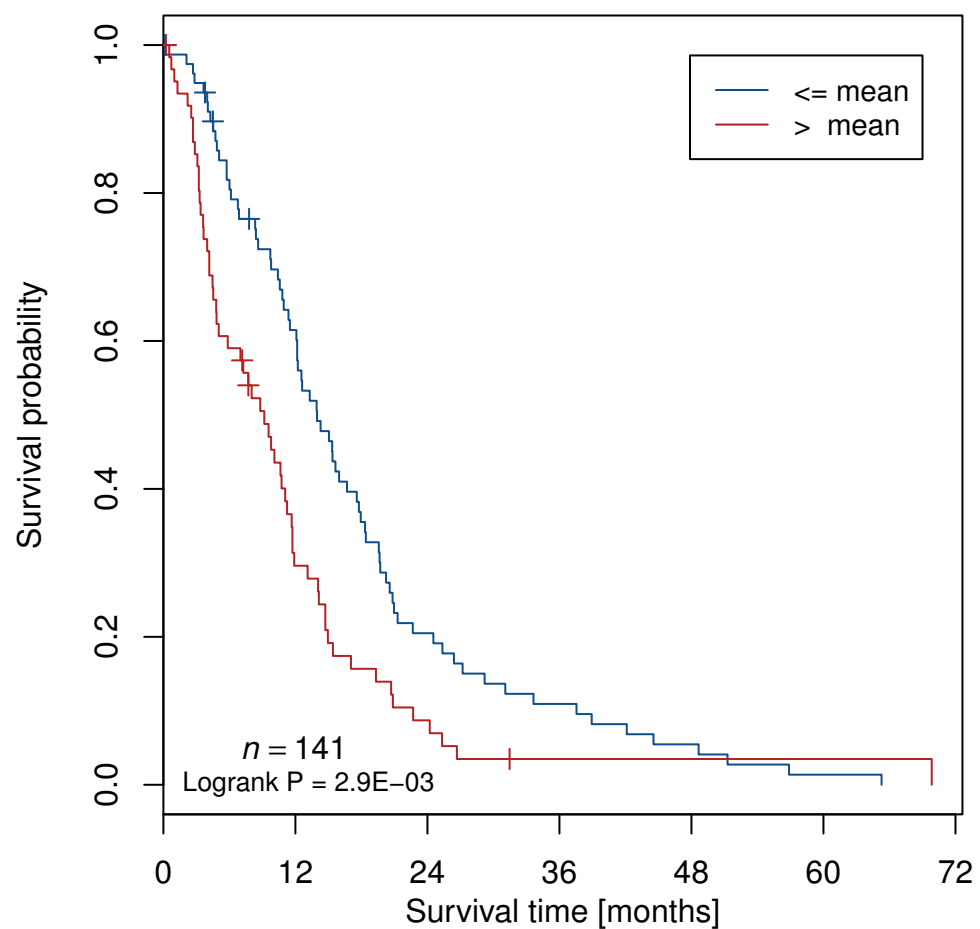

## No. At Risk

|         | 0  | 12 | 24 | 36 | 48 | 60 | 72 |
|---------|----|----|----|----|----|----|----|
| <= mean | 79 | 45 | 15 | 8  | 4  | 1  | 0  |
| > mean  | 62 | 17 | 5  | 1  | 1  | 1  | 0  |

D

## Total Tumor Volume

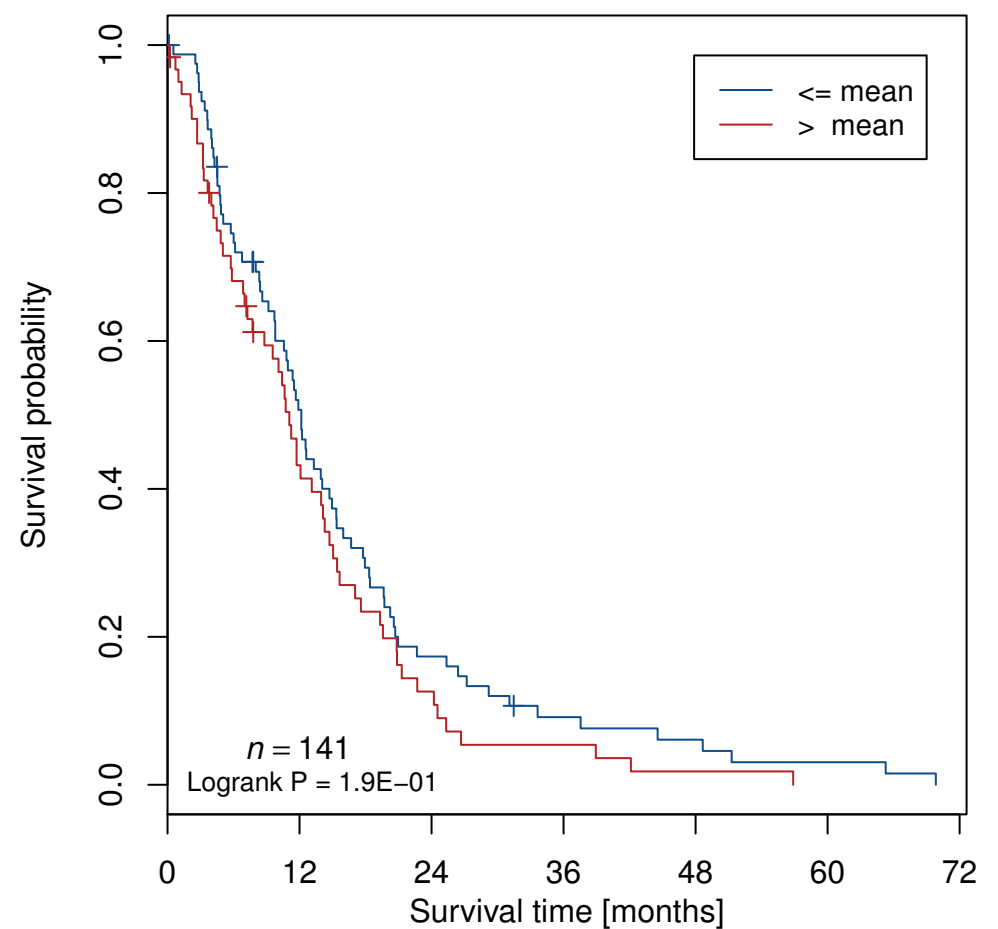

## No. At Risk

|         | 0  | 12 | 24 | 36 | 48 | 60 | 72 |
|---------|----|----|----|----|----|----|----|
| <= mean | 80 | 38 | 13 | 6  | 4  | 2  | 0  |
| > mean  | 61 | 24 | 7  | 3  | 1  | 0  | 0  |
